# Supplementary material for: Microfluidic Coupling of Step Emulsification and Deterministic Lateral Displacement for Producing Satellite-Free Droplets and Particles
Source: Micromachines (Basel). 2023 Mar 8;14(3):622. doi: 10.3390/mi14030622 (PMC10055132; doi:10.3390/mi14030622)
Supplement: Supplementary file 1 [file micromachines-14-00622-s001.zip]

Archive with 5 entries (5 files):
- micromachines-2266134-Supplementary Materials.pdf
- VideoS1.mp4
- VideoS2.mp4
- VideoS3.mp4
- VideoS4.mp4
